# Supplementary material
Source: HighWire-hosted journal article supplement (https://bmjopenrespres.bmj.com/content/9/1/e001381)
Supplement: inline-supplementary-material-2 [file inline-supplementary-material-2.pdf]

## Appendix

Appendix Table 1: Training topics

| Topic                             | Content                                                                                                                                                                                                                                                                                                                                                                                                                                                                                                                                                                                                                                                                                                                                |
|-----------------------------------|----------------------------------------------------------------------------------------------------------------------------------------------------------------------------------------------------------------------------------------------------------------------------------------------------------------------------------------------------------------------------------------------------------------------------------------------------------------------------------------------------------------------------------------------------------------------------------------------------------------------------------------------------------------------------------------------------------------------------------------|
| Welcome and introduction          | <ul style="list-style-type: none"> <li>• Introductions and roles</li> <li>• Overview of intervention and trial               <ul style="list-style-type: none"> <li>○ Rationale</li> <li>○ Aims and outcomes</li> <li>○ Intervention design</li> <li>○ Role of nurses in intervention</li> <li>○ Study timeline</li> </ul> </li> </ul>                                                                                                                                                                                                                                                                                                                                                                                                 |
| CF Fundamentals                   | <ul style="list-style-type: none"> <li>• CF 101               <ul style="list-style-type: none"> <li>○ Life course and daily life</li> <li>○ Late-stage illness and death</li> <li>○ Palliative needs and goals of care</li> </ul> </li> <li>• CF primary treatments               <ul style="list-style-type: none"> <li>○ Daily treatments</li> <li>○ Transplant</li> <li>○ Modulators</li> </ul> </li> <li>• CF care delivery               <ul style="list-style-type: none"> <li>○ Structure of the multidisciplinary care team</li> <li>○ Transitions from pediatric to adult care</li> </ul> </li> <li>• Daily life with CF</li> <li>• Discussion: Similarities and differences between CF and other serious illness</li> </ul> |
| Symptoms in CF                    | <ul style="list-style-type: none"> <li>• Overview of physical symptoms</li> <li>• Epidemiology of emotional, spiritual and existential symptoms</li> <li>• Issues specific to adulthood with CF</li> <li>• Treatment options/considerations specific to CF</li> </ul>                                                                                                                                                                                                                                                                                                                                                                                                                                                                  |
| Social context                    | <ul style="list-style-type: none"> <li>• Caregivers and their roles: parents, spouses, other</li> <li>• Adults with CF relationships with caregivers, family, social support</li> <li>• Reproduction, parenting and CF</li> <li>• Caregivers' needs</li> <li>• Adult with CF social roles (employment, education, disability)</li> </ul>                                                                                                                                                                                                                                                                                                                                                                                               |
| Establishing therapeutic alliance | <ul style="list-style-type: none"> <li>• Asking about history and symptoms</li> <li>• Eliciting patient understanding of and interest in prognosis</li> <li>• Communicating with CF care team</li> </ul>                                                                                                                                                                                                                                                                                                                                                                                                                                                                                                                               |
| Skills presentation               | Short (15 minute) mock encounter with standardized patient (SP)                                                                                                                                                                                                                                                                                                                                                                                                                                                                                                                                                                                                                                                                        |
| Skills demo                       | Interventionists will rotate through conversations about prognostic understanding with three SPs representing different patient scenarios (e.g., reluctant to discuss, interested in knowing more).                                                                                                                                                                                                                                                                                                                                                                                                                                                                                                                                    |
| Introducing goals of care in CF   | <ul style="list-style-type: none"> <li>• Identifying surrogate</li> <li>• Previewing future conversations</li> <li>• Identifying patient worries</li> </ul>                                                                                                                                                                                                                                                                                                                                                                                                                                                                                                                                                                            |

|                        |                                                                                                                                                                                                  |
|------------------------|--------------------------------------------------------------------------------------------------------------------------------------------------------------------------------------------------|
| Skills presentation    | Short mock encounter with SP                                                                                                                                                                     |
| Skills demo            | Interventionists will rotate through conversations introducing GOC/ACP with three SPs representing different patient scenarios (e.g., reluctant to discuss, interested in knowing more)          |
| Recap: role in study   | <ul style="list-style-type: none"><li>• Responsibilities for each intervention encounter</li><li>• Plans for intervention team discussions</li><li>• Study support staff and resources</li></ul> |
| Technology and support | <ul style="list-style-type: none"><li>• Responsibilities for data collection</li><li>• Introduction to REDCap</li><li>• Fidelity monitoring and feedback: how to record encounters</li></ul>     |
